# Supplementary material for: Global assessment of how reservoirs and desalination plants enhance human water security
Source: Research Square preprint supplement (doi:10.21203/rs.3.rs-8116124/v1), 2026-01-21
Supplement: Supplementary file 1 [file e2e2b6448053d13495183e6a.pdf]

# **Supplementary information for “Global assessment of how reservoirs and desalination plants enhance human water security”**

Corresponding author: Akiko Matsumura (matsumura-ak@n-koei.jp)

## **Table of Contents:**

### **Supplementary Discussions**

Reproducibility of river discharge

Reproducibility of reservoir storage

### **Supplementary Tables**

Supplementary Table 1: Global hydrological fluxes, human water requirements, and deficits in available water resources, with and without infrastructure

Supplementary Table 2: Top 20 basins where RDs most effectively reduced water scarcity

Supplementary Table 3: Validation results for monthly discharge based on the Kling-Gupta Efficiency (KGE) and its three components

Supplementary Table 4: Validation results for monthly reservoir storage in the Murray River Basin

### **Supplementary Figures**

Supplementary Fig. 1: Flow diagram of the methodology of this study

Supplementary Fig. 2: Map and area distribution of the subbasins developed in this study.

Supplementary Fig. 3: Conceptual diagram of relative flow alteration and its decomposition into augmentation, interannual reallocation, and seasonal reallocation

Supplementary Fig. 4: Validation results for monthly discharge based on the Kling-Gupta Efficiency (KGE) and its three components (corresponding to Supplementary Table 3)

Supplementary Figs. 5-9: Time series of monthly discharge at 25 selected observation stations

Supplementary Figs. 10-11: Time series of monthly reservoir storage in the Murray River Basin with good agreement

Supplementary Fig. 12: Time series of monthly reservoir storage in the Murray River Basin with poor agreement

### **Supplementary References**

## Supplementary Discussions

### Reproducibility of river discharge

To verify whether the model adequately represents the effects of reservoirs and desalinations (RDs), we examined whether incorporating RDs improves the model's ability to reproduce observed streamflow. The analysis focused on 12 basins selected from the top 20 basins where RDs most effectively mitigated water scarcity and for which more than 10 years of monthly discharge observations were available. River discharge data were obtained from the Global Runoff Data Centre (GRDC), 56068 Koblenz, Germany.

For each basin, up to three gauging stations were selected. The selection criteria were as follows: (i) the presence of upstream reservoirs; (ii) the dominance of reservoirs constructed before 1980; and (iii) a preference for stations with smaller discharge bias, defined as the ratio of long-term mean discharge between observations and simulations, when multiple stations were available. Criteria (iii) was adopted because extremely large deviations in observed discharge often indicate problems such as positional discrepancies or the influence of nearby artificial water-intake facilities. Model performance was evaluated using the Kling–Gupta efficiency (KGE)<sup>1</sup> and its three components—correlation, variability, and bias—based on monthly discharge.

The results (Supplementary Fig. 4 and Supplementary Table 3) show that, in most basins, the inclusion of RDs led to higher KGE values, indicating that the model reproduced the observed discharge variability more accurately. Corresponding improvements were found in the individual KGE components when RDs were considered. An exception was the Syr Darya Basin, where the model's baseline performance was already low. Previous studies have suggested that this may be related to issues in the precipitation datasets used for the region<sup>2</sup>.

Overall, the model tended to exhibit a positive bias (i.e., overestimation of streamflow), particularly in the Murray–Darling, Godavari, Krishna, and Guadalquivir basins. This overestimation is consistent with the known limitations of global hydrological models reported in previous studies<sup>3</sup>. In several basins, such as Sacramento and Chao Phraya, the simulated peaks remained higher than the observed peaks even when RDs were considered (Supplementary Figs. 5–9). One possible reason is that the reservoir operations in this study did not account for purposes other than water supply, such as hydropower generation, leading to an underestimation of reservoir regulation effects. In the Krishna Basin, the inclusion of RDs improved the simulation of wet-season flows, bringing them closer to the observations. However, it also led to an overestimation of dry-season flows, possibly due to uncertainties in irrigation return flow and evaporation losses (Supplementary Fig. 5).

Despite these basin-specific issues, the overall results demonstrate that the model more accurately reproduces the observed discharge when RDs are incorporated, confirming the importance of explicitly representing reservoir and desalination processes in large-scale hydrological modelling.

## Reproducibility of reservoir storage

To verify reservoir operations, we used in situ reservoir storage records of reservoirs in the Murray River Basin provided by the Australian Bureau of Meteorology<sup>4</sup>. This basin was chosen for the validation study because it is a basin where reservoirs play a major role in water supply and because of the availability of quality-controlled data for this basin. Among the reservoirs in the basin, 13 reservoirs with a water supply capacity greater than 50 million cubic meters and an observation period covering the years 1980 - 2019 were selected. Four metrics were used for comparison: the relative root mean square error (rRMSE, calculated as the RMSE normalized by the mean of the observed reservoir storage), the correlation coefficient of monthly reservoir storage (CC-M), the correlation coefficient of mean monthly reservoir storage (CC-MM), and the correlation coefficient of annual reservoir storage (CC-A).

Supplementary Table 4 shows good agreement between the observed and simulated reservoir storage values, with CC-M values exceeding 0.6 in 10 of the 13 reservoirs, CC-A values exceeding 0.6 in 9 reservoirs, and CC-MM values exceeding 0.8 in 12 reservoirs, indicating high reproducibility of the seasonal variation. The time series of observed and simulated monthly reservoir storage for reservoirs in good agreement are shown in Supplementary Figs. 10--11.

Each reservoir with poor agreement, as shown in Supplementary Fig. 12, was considered to have different factors. For Blowering, the underestimation of storage variability in the simulation may be attributed to the underestimation of river flow into the reservoir. The simulated average river flow at the reservoir was approximately 16 m<sup>3</sup>/s, whereas the observation was approximately 46 m<sup>3</sup>/s (the value of river flow at the “Tumut River at Oddys bridge”<sup>4</sup> just downstream of the Blowering Dam), nearly three times greater than the simulation. The Waranga Basin provides off-river storage, and water is diverted from surrounding rivers via canals<sup>5</sup>. The underestimation of storage variability in the simulated reservoir may be attributed to the underestimation of inflows to the reservoir because the interbasin or intertributary canals were not implemented in the simulation. The Yarrawonga weir works to increase the water level in the river Murray so that water can be diverted via channels to irrigate land<sup>6</sup>. This function is completely different from that of a dam, and the poor reproducibility of seasonal variations may be explained by the fact that this was a weir.

Overall, despite the limitations of our methodology in reservoir operation models (see Methods in main), time series of reservoir storage correlate well with observations in most of the water supply reservoirs in the Murray River Basin. For reservoirs with poor reproducibility in the Murray River Basin, the issues were outside the reservoir operation model. To address issues in such reservoirs, improving the reproducibility of river flows, incorporating canals associated with reservoirs, and distinguishing weirs that operate differently from reservoirs would be effective.

## Supplementary Tables

**Supplementary Table 1: Global hydrological fluxes, human water requirements, and deficits in available water resources, with and without infrastructure.** Evaluated under climatic conditions from 1980–2019 and social conditions in approximately 2015. Drylands and humid lands are evaluated on the basis of the aridity index (see Extended Data Fig. 3 in the main text).

| Run name                           | Natural                            | woRD                               |             | woRDwD                             |             |              | wRD                                |             |              |
|------------------------------------|------------------------------------|------------------------------------|-------------|------------------------------------|-------------|--------------|------------------------------------|-------------|--------------|
| Unit                               | km <sup>3</sup> year <sup>-1</sup> | km <sup>3</sup> year <sup>-1</sup> | (%)         | km <sup>3</sup> year <sup>-1</sup> | (%)         | (%)          | km <sup>3</sup> year <sup>-1</sup> | (%)         | (%)          |
|                                    |                                    | a)                                 |             | b)                                 | b) - a)     |              | c)                                 | c) - a)     |              |
| <b>Precipitation</b>               | <b>114,145</b>                     | <b>114,145</b>                     |             | <b>114,145</b>                     |             |              | <b>114,145</b>                     |             |              |
| <b>Evapotranspiration</b>          | <b>68,397</b>                      | <b>68,959</b>                      |             | <b>68,959</b>                      |             |              | <b>68,959</b>                      |             |              |
| <b>River discharge</b>             | <b>45,468</b>                      | <b>45,021</b>                      |             | <b>45,025</b>                      |             |              | <b>44,859</b>                      |             |              |
| <b>HWRs (Global)</b>               | -                                  | <b>4,100</b>                       |             | <b>4,100</b>                       |             |              | <b>4,100</b>                       |             |              |
| Domestic                           |                                    | 475                                |             | 475                                |             |              | 475                                |             |              |
| Industrial                         |                                    | 662                                |             | 662                                |             |              | 662                                |             |              |
| Agricultural                       |                                    | 2,962                              |             | 2,962                              |             |              | 2,962                              |             |              |
| <b>Water deficit (Global)</b>      | -                                  | <b>1,526</b>                       | <b>37.2</b> | <b>1,522</b>                       | <b>37.1</b> | <b>-0.10</b> | <b>1,304</b>                       | <b>31.8</b> | <b>-5.42</b> |
| Chronic deficit                    |                                    | 590                                | 14.4        | 586                                | 14.3        | -0.10        | 583                                | 14.2        | -0.16        |
| Temporal deficit                   |                                    | 936                                | 22.8        | 937                                | 22.8        | 0.00         | 721                                | 17.6        | -5.26        |
| <b>HWRs (Drylands)</b>             | -                                  | <b>2,198</b>                       |             | <b>2,198</b>                       |             |              | <b>2,198</b>                       |             |              |
| Domestic                           |                                    | 191                                |             | 666                                |             |              | 666                                |             |              |
| Industrial                         |                                    | 223                                |             | 885                                |             |              | 885                                |             |              |
| Agricultural                       |                                    | 1,784                              |             | 4,746                              |             |              | 4,746                              |             |              |
| <b>Water deficit (Drylands)</b>    | -                                  | <b>1,120</b>                       | <b>51.0</b> | <b>1,116</b>                       | <b>50.8</b> | <b>-0.18</b> | <b>978</b>                         | <b>44.5</b> | <b>-6.45</b> |
| Chronic deficit                    |                                    | 561                                | 25.5        | 557                                | 25.3        | -0.19        | 555                                | 25.2        | -0.29        |
| Temporal deficit                   |                                    | 559                                | 25.4        | 559                                | 25.4        | 0.00         | 424                                | 19.3        | -6.16        |
| <b>HWRs (Humid lands)</b>          | -                                  | <b>1,902</b>                       |             | <b>1,902</b>                       |             |              | <b>1,902</b>                       |             |              |
| Domestic                           |                                    | 284                                |             | 284                                |             |              | 284                                |             |              |
| Industrial                         |                                    | 439                                |             | 439                                |             |              | 439                                |             |              |
| Agricultural                       |                                    | 1,178                              |             | 1,178                              |             |              | 1,178                              |             |              |
| <b>Water deficit (Humid lands)</b> | -                                  | <b>406</b>                         | <b>21.4</b> | <b>406</b>                         | <b>21.4</b> | <b>0.00</b>  | <b>326</b>                         | <b>17.1</b> | <b>-4.23</b> |
| Chronic deficit                    |                                    | 29                                 | 1.5         | 29                                 | 1.5         | 0.00         | 28                                 | 1.5         | -0.02        |
| Temporal deficit                   |                                    | 378                                | 19.9        | 378                                | 19.9        | 0.00         | 297                                | 15.6        | -4.21        |

a)-c) indicate percentages relative to the total HWRs within each region (global, drylands, humid lands).

### Abbreviations:

HWRs: Human Water Requirements, Natural: naturalized conditions (without human intervention)

woRD: without Reservoirs and Desalinations, woRDwD: with Desalinations, wRD: with Reservoirs and Desalinations



**Supplementary Table 2: Top 20 basins where RDs most effectively reduced water scarcity.** The basins included in the rankings have areas larger than 50,000 km<sup>2</sup> and an average natural flow exceeding 20 m<sup>3</sup>/s. The values for RFAs, type, and the reduction in the CDTD due to RDs correspond to those shown in Fig. 4 in the main text.

| No. | Name (river/basin) | Country        | Basin water scarcity indexes |                                      |              | Flow alterations by RDs |                         |            |      | Hydrological conditions |                                                              |                                                                       |            |               |                                  |                                 |            |                      |
|-----|--------------------|----------------|------------------------------|--------------------------------------|--------------|-------------------------|-------------------------|------------|------|-------------------------|--------------------------------------------------------------|-----------------------------------------------------------------------|------------|---------------|----------------------------------|---------------------------------|------------|----------------------|
|     |                    |                | CDTD (woRD)                  | Chronic Deficit (% of total deficit) | ΔCDTD by RDs | a) Total RFA (%)        | b) Inter-annual RFA (%) | b) % of a) | Type | Area (km <sup>2</sup> ) | c) Average water resources (m <sup>3</sup> s <sup>-1</sup> ) | d) Average human water requirements (m <sup>3</sup> s <sup>-1</sup> ) | d) % of c) | Aridity Index | e) CV of monthly river discharge | f) CV of annual river discharge | f) % of e) | Number of reservoirs |
|     |                    |                |                              |                                      |              |                         |                         |            |      |                         |                                                              |                                                                       |            |               |                                  |                                 |            |                      |
| *   |                    |                |                              |                                      |              |                         |                         |            |      | ***                     |                                                              |                                                                       | ***        |               |                                  | ***                             |            |                      |
| 1   | Krishna            | India          | 42.7                         | 11.5                                 | 25.2         | 37.1                    | 4.3                     | 11.6       | A    | 257,187                 | 2,377                                                        | 2,018                                                                 | 84.9       | 0.39          | 1.39                             | 0.26                            | 19.0       | 62                   |
| 2   | Sacramento         | USA            | 24.6                         | 0.0                                  | 21.2         | 17.5                    | 4.3                     | 24.4       | B    | 71,377                  | 1,354                                                        | 213                                                                   | 15.8       | 0.66          | 1.37                             | 0.45                            | 33.0       | 50                   |
| 3   | Narmada            | India          | 51.9                         | 0.0                                  | 20.7         | 25.4                    | 2.1                     | 8.2        | A    | 96,371                  | 1,883                                                        | 733                                                                   | 38.9       | 0.56          | 1.66                             | 0.29                            | 17.2       | 12                   |
| 4   | Syr Darya          | see List A*    | 39.9                         | 24.5                                 | 20.4         | 25.7                    | 6.5                     | 25.5       | B    | 355,877                 | 781                                                          | 614                                                                   | 78.6       | 0.28          | 0.93                             | 0.31                            | 33.3       | 13                   |
| 5   | Chao Phraya        | Thailand       | 60.1                         | 27.4                                 | 19.3         | 27.0                    | 4.2                     | 15.7       | A    | 160,313                 | 2,005                                                        | 1,849                                                                 | 92.2       | 0.71          | 1.17                             | 0.28                            | 24.1       | 10                   |
| 6   | Red                | China, Vietnam | 25.8                         | 0.0                                  | 19.0         | 6.6                     | 0.3                     | 5.1        | A    | 140,962                 | 3,040                                                        | 285                                                                   | 9.4        | 1.24          | 1.07                             | 0.15                            | 14.1       | 20                   |
| 7   | Godavari           | India          | 39.1                         | 1.8                                  | 18.9         | 13.1                    | 1.7                     | 13.3       | A    | 308,639                 | 5,354                                                        | 1,413                                                                 | 26.4       | 0.57          | 1.46                             | 0.26                            | 17.6       | 56                   |
| 8   | Guadalquivir       | Spain          | 30.6                         | 0.0                                  | 18.0         | 20.7                    | 8.6                     | 41.5       | C    | 57,272                  | 316                                                          | 126                                                                   | 39.8       | 0.41          | 1.73                             | 0.75                            | 43.2       | 37                   |
| 9   | Tigris Euphrates   | See List B*    | 42.0                         | 27.3                                 | 17.9         | 24.7                    | 4.9                     | 20.0       | B    | 772,774                 | 2,540                                                        | 1,517                                                                 | 59.7       | 0.17          | 0.87                             | 0.39                            | 45.0       | 50                   |
| 10  | Colombia           | USA            | 28.3                         | 9.2                                  | 17.2         | 7.7                     | 1.0                     | 12.8       | A    | 650,913                 | 6,106                                                        | 913                                                                   | 15.0       | 0.62          | 0.62                             | 0.22                            | 35.9       | 124                  |
| 11  | Hooghly            | India          | 37.4                         | 0.0                                  | 16.0         | 16.7                    | 1.4                     | 8.2        | A    | 81,065                  | 1,800                                                        | 802                                                                   | 44.6       | 0.86          | 1.33                             | 0.27                            | 20.0       | 8                    |
| 12  | Balsas             | Mexico         | 38.8                         | 0.0                                  | 14.5         | 5.8                     | 0.5                     | 8.8        | A    | 112,977                 | 968                                                          | 160                                                                   | 16.6       | 0.54          | 1.16                             | 0.26                            | 22.0       | 15                   |
| 13  | Moulouya           | Morocco        | 22.9                         | 0.0                                  | 14.5         | 18.2                    | 8.0                     | 43.8       | C    | 54,604                  | 44                                                           | 14                                                                    | 32.3       | 0.17          | 1.47                             | 0.79                            | 53.9       | 3                    |
| 14  | Tapti              | India          | 36.9                         | 0.0                                  | 14.1         | 9.6                     | 1.0                     | 10.2       | A    | 64,457                  | 778                                                          | 200                                                                   | 25.8       | 0.45          | 1.73                             | 0.37                            | 21.4       | 8                    |
| 15  | Murray-Darling     | Australia      | 31.2                         | 42.3                                 | 13.7         | 14.3                    | 5.0                     | 35.1       | C    | 931,506                 | 1,426                                                        | 467                                                                   | 32.7       | 0.24          | 0.94                             | 0.47                            | 49.5       | 54                   |
| 16  | Save               | See List C*    | 18.2                         | 0.0                                  | 12.1         | 5.5                     | 1.9                     | 34.2       | C    | 101,682                 | 384                                                          | 30                                                                    | 7.9        | 0.34          | 2.27                             | 0.83                            | 36.5       | 23                   |
| 17  | Mahanadi           | India          | 42.2                         | 0.0                                  | 11.9         | 10.0                    | 1.1                     | 11.1       | A    | 135,089                 | 3,279                                                        | 1,117                                                                 | 34.1       | 0.73          | 1.49                             | 0.22                            | 15.0       | 22                   |
| 18  | Tagus              | Spain          | 14.2                         | 0.0                                  | 11.6         | 14.3                    | 5.0                     | 35.1       | C    | 84,988                  | 565                                                          | 155                                                                   | 27.5       | 0.46          | 1.37                             | 0.50                            | 36.7       | 48                   |
| 19  | Mekong             | See List D*    | 28.4                         | 0.0                                  | 11.0         | 4.0                     | 0.2                     | 5.9        | A    | 777,152                 | 17,727                                                       | 1,677                                                                 | 9.5        | 0.98          | 0.90                             | 0.12                            | 13.8       | 38                   |
| 20  | Yaqui              | Mexico         | 26.3                         | 0.0                                  | 10.8         | 17.0                    | 6.3                     | 37.0       | C    | 72,457                  | 119                                                          | 37                                                                    | 30.7       | 0.32          | 1.28                             | 0.45                            | 35.1       | 3                    |

Abbreviations) RD: Reservoirs and Desalinations, woRD: without Reservoirs and Desalinations, CDTD: Cumulative Deficit to Demand, RFA: Relative Flow Alteration, CV: Coefficient of Variance

\*) List A: [Kyrgyzstan, Uzbekistan, Tajikistan, Kazakhstan], List B: [Turkey, Syria, Iraq, Iran, Kuwait], List C: [Zimbabwe, Mozambique], List D: [Cambodia, China, Lao PDR, Myanmar, Thailand, Vietnam]

\*\*) Type A: seasonal reallocator, Type B: moderate interannual buffer, Type C: strong interannual buffer, Type D: freshwater augments

\*\*\*) Evaluated under naturalized conditions (i.e., without human intervention)

**Supplementary Table 3: Validation results for monthly discharge based on the Kling-Gupta Efficiency (KGE) and its three components.** The results are shown for 25 stations across 12 basins.

| GRCD ID | River discharge station metadata |                              |           |             |                                   |              |                     | woRD simulation |       |          |         | wRD simulation |       |          |         |
|---------|----------------------------------|------------------------------|-----------|-------------|-----------------------------------|--------------|---------------------|-----------------|-------|----------|---------|----------------|-------|----------|---------|
|         | Basin name                       | Station name                 | Latitude  | Longitude   | Catchment area (km <sup>2</sup> ) | Altitude (m) | Availability (year) | KGE             | r     | $\alpha$ | $\beta$ | KGE            | r     | $\alpha$ | $\beta$ |
| 2854180 | Krishna                          | YADGIRI                      | 16.737    | 77.127      | 69,863                            | 350          | 29.7                | -0.77           | 0.76  | 1.88     | 2.52    | -0.17          | 0.80  | 1.34     | 2.10    |
| 2854400 | Krishna                          | BAWAPURAM                    | 15.8831   | 77.9569     | 67,180                            | 272          | 37.2                | -2.20           | 0.73  | 2.75     | 3.67    | -1.47          | 0.79  | 2.07     | 3.22    |
| 4146281 | Sacramento                       | VERONA, CA                   | 38.7743   | -121.5983   | 55,040                            | -1           | 40.0                | -1.86           | 0.84  | 3.72     | 1.87    | -1.45          | 0.87  | 3.29     | 1.85    |
| 4146270 | Sacramento                       | FAIR OAKS, CA                | 38.6355   | -121.2277   | 4,890                             | 22           | 40.0                | -0.04           | 0.66  | 1.90     | 1.40    | 0.20           | 0.72  | 1.64     | 1.40    |
| 2416850 | Syr-Darya                        | UCH-KURGAN                   | 41.17     | 72.1        | 58,400                            | 498          | 11.0                | -0.30           | -0.04 | 0.60     | 0.32    | -0.66          | -0.33 | 0.28     | 0.32    |
| 2964100 | Chao-Phraya                      | NAKHON SAWAN                 | 15.67     | 100.12      | 110,569                           | 17           | 14.3                | -1.50           | 0.72  | 3.29     | 1.96    | -0.39          | 0.72  | 2.08     | 1.82    |
| 2964150 | Chao-Phraya                      | UTHAI THANI                  | 15.3797   | 100.0353    | 3,865                             | -999         | 15.9                | -1.45           | 0.73  | 3.18     | 2.08    | -0.40          | 0.73  | 2.05     | 1.88    |
| 2856500 | Godavari                         | MANCHERIAL                   | 18.83444  | 79.4517     | 102,900                           | 124          | 38.3                | -2.35           | 0.68  | 2.44     | 4.01    | -1.94          | 0.72  | 1.88     | 3.79    |
| 2856550 | Godavari                         | ASHTI                        | 19.685    | 79.789      | 50,990                            | 137          | 40.0                | 0.04            | 0.91  | 1.59     | 1.75    | 0.15           | 0.92  | 1.46     | 1.70    |
| 2856900 | Godavari                         | POLAVARAM                    | 17.252    | 81.6525     | 299,320                           | -999         | 39.9                | -0.24           | 0.89  | 1.80     | 1.93    | -0.08          | 0.89  | 1.61     | 1.89    |
| 6217100 | Guadalquivir                     | ALCALA DEL RIO               | 37.51844  | -5.97639    | 46,134                            | 10           | 15.8                | -2.89           | 0.92  | 3.44     | 4.02    | -2.48          | 0.92  | 2.62     | 4.08    |
| 6217135 | Guadalquivir                     | CORDOBA                      | 37.87936  | -4.77485    | 24,704                            | 86           | 15.8                | -2.58           | 0.83  | 4.12     | 2.73    | -1.12          | 0.80  | 2.36     | 2.61    |
| 4115200 | Colombia                         | THE DALLS, OR                | 45.6073   | -121.1734   | 613,830                           | -999         | 40.0                | 0.47            | 0.78  | 1.44     | 0.79    | 0.57           | 0.78  | 1.29     | 0.77    |
| 4115080 | Colombia                         | CASTLE ROCK, WA              | 46.2748   | -122.9146   | 5,796                             | 6            | 32.8                | 0.18            | 0.85  | 1.80     | 1.14    | 0.18           | 0.85  | 1.80     | 1.14    |
| 4115101 | Colombia                         | PORTLAND, OR                 | 45.5185   | -122.6679   | 29,008                            | 0            | 40.0                | 0.60            | 0.95  | 1.38     | 1.13    | 0.64           | 0.96  | 1.34     | 1.13    |
| 4355225 | Balsas                           | CAIMANERA, MICH.             | 18.5      | -100.9      | -999                              | 234          | 22.9                | -1.14           | 0.93  | 2.60     | 2.43    | -1.05          | 0.93  | 2.51     | 2.39    |
| 5204101 | Murray-Darling                   | D/S MAUDE WEIR               | -34.4776  | 144.301     | 57,700                            | 80           | 37.0                | -2.30           | 0.78  | 3.14     | 3.50    | -1.64          | 0.80  | 2.37     | 3.25    |
| 5304140 | Murray-Darling                   | BELOW WAKOOL JUNCTION        | -34.8472  | 143.342     | 116,393                           | 64           | 39.0                | -1.51           | 0.66  | 2.80     | 2.71    | -0.71          | 0.78  | 1.98     | 2.38    |
| 6113050 | Tagus                            | ALMOUROL                     | 39.461    | -8.375      | 67,482                            | 19           | 37.3                | 0.17            | 0.93  | 1.57     | 1.61    | 0.29           | 0.94  | 1.36     | 1.61    |
| 6113110 | Tagus                            | ALBUFEIRA DE BELVER (R.E.)   | 39.48     | -7.998      | 61,540                            | 39           | 29.6                | -0.25           | 0.91  | 1.89     | 1.87    | -0.06          | 0.92  | 1.61     | 1.86    |
| 2969220 | Mekong                           | KAENG SAPHU TAI (DOWNSTREAM) | 15.24     | 105.2483    | 116,000                           | 105          | 14.0                | -0.05           | 0.91  | 1.68     | 1.79    | 0.14           | 0.91  | 1.50     | 1.70    |
| 2969200 | Mekong                           | UBON                         | 15.2217   | 104.8617    | 104,000                           | 105          | 14.0                | -0.18           | 0.87  | 1.69     | 1.95    | 0.03           | 0.87  | 1.47     | 1.84    |
| 2969150 | Mekong                           | YASOTHON                     | 15.7817   | 104.1417    | 43,100                            | 117          | 13.0                | -0.44           | 0.83  | 2.05     | 1.98    | 0.06           | 0.83  | 1.46     | 1.80    |
| 4353015 | Yaqui                            | EL CUBIL                     | 29.216667 | -109.233333 | -999                              | 350          | 30.0                | 0.71            | 0.79  | 0.81     | 1.04    | 0.69           | 0.78  | 0.79     | 1.04    |
| 4353020 | Yaqui                            | EL CUBIL, SON.               | 29.2      | -109.233333 | -999                              | 350          | 24.3                | 0.59            | 0.65  | 1.17     | 1.14    | 0.60           | 0.64  | 1.12     | 1.13    |

Station name, latitude, longitude, catchment area, and altitude are obtained from the Global Runoff Data Centre (GRDC), 56068 Koblenz, Germany.

Availability indicates the number of years for which observational data are available between 1980 and 2019.

“-999” denotes undefined (missing) values.

KGE, r,  $\alpha$ , and  $\beta$  represent the Kling–Gupta efficiency and its three components: the correlation coefficient (r), the ratio of standard deviations ( $\alpha$ ), and the mean bias ratio ( $\beta$ ).

woRD: without Reservoirs and Desalinations, wRD: with Reservoirs and Desalinations

|        |                                       |
|--------|---------------------------------------|
| Better | : wRD performs better than woRD.      |
| Same   | : no difference between wRD and woRD. |
| Worse  | : wRD performs worse than woRD.       |

**Supplementary Table 4: Validation results for monthly reservoir storage in the Murray River Basin.**

| ID   | Name            | Capacity<br>(million m <sup>3</sup> s <sup>-1</sup> ) | Catchment<br>area<br>(km <sup>3</sup> ) | rRMSE<br>(%) | CC-M<br>(-) | CC-MM<br>(-) | CC-A<br>(-) |
|------|-----------------|-------------------------------------------------------|-----------------------------------------|--------------|-------------|--------------|-------------|
| 6605 | Wyangala        | 1,220                                                 | 8,217                                   | 34.6         | 0.897       | 0.865        | 0.916       |
| 6643 | Eppalock        | 312                                                   | 2,053                                   | 31.8         | 0.885       | 0.958        | 0.904       |
| 6653 | Eildon          | 3,390                                                 | 3,881                                   | 49.4         | 0.841       | 0.846        | 0.886       |
| 6628 | Hume            | 3,038                                                 | 15,312                                  | 45.5         | 0.820       | 0.944        | 0.830       |
| 6649 | Tullaroop       | 74                                                    | 720                                     | 39.0         | 0.818       | 0.875        | 0.777       |
| 6637 | Dartmouth       | 4,057                                                 | 3,559                                   | 38.8         | 0.792       | 0.929        | 0.809       |
| 6647 | Cairn Curran    | 148                                                   | 1,630                                   | 41.6         | 0.766       | 0.876        | 0.729       |
| 6621 | Corin           | 75                                                    | 194                                     | 26.7         | 0.762       | 0.813        | 0.796       |
| 6613 | Burrinjuck      | 1,026                                                 | 13,112                                  | 35.0         | 0.731       | 0.968        | 0.714       |
| 6619 | Googong         | 125                                                   | 897                                     | 33.2         | 0.627       | 0.846        | 0.653       |
| 6618 | Blowering       | 1,628                                                 | 1,622                                   | 62.8         | 0.360       | 0.964        | 0.369       |
| 6635 | Waranga Basin   | 411                                                   | 110                                     | 60.4         | 0.121       | 0.944        | 0.037       |
| 6626 | Yarrawonga Weir | 118                                                   | 26,108                                  | 24.5         | -0.013      | -0.700       | 0.073       |

The ID, Name, Capacity, and Catchment area were obtained from the GRand database. Correlation Coefficient

rRMSE: relative Root Mean Square Error

CC-M: Correlation Coefficient of Monthly reservoir storage

CC-MM: Correlation Coefficient of Monthly reservoir storage

CC-A: Correlation Coefficient of Annual reservoir storage

|  |         |
|--|---------|
|  | 0.8-1.0 |
|  | 0.5-0.8 |
|  | < 0.5   |

## Supplementary Figures

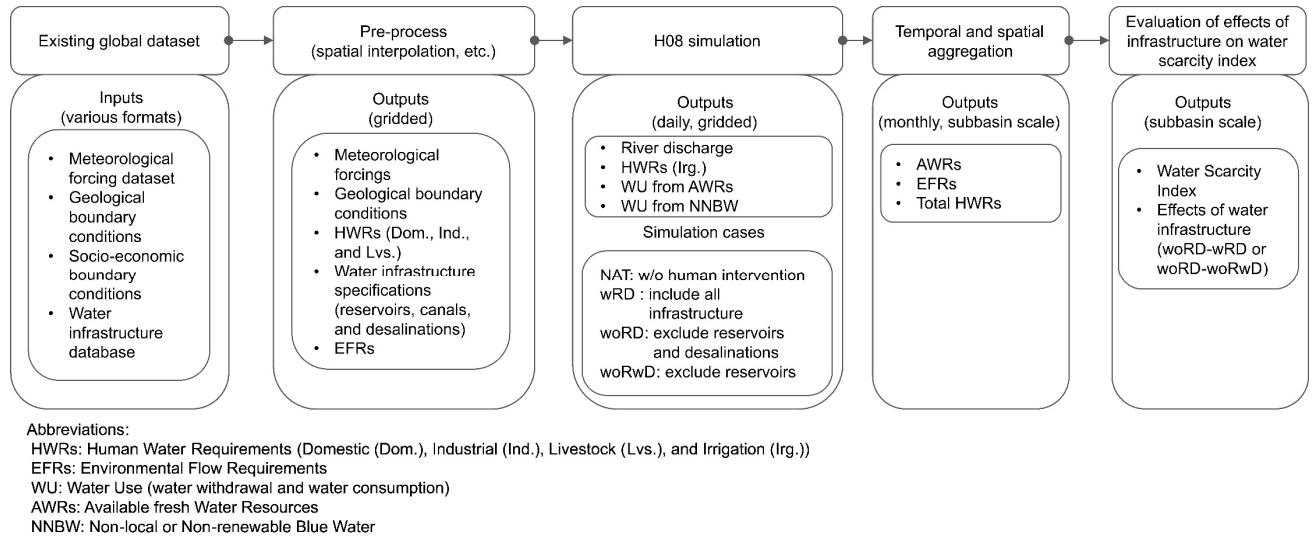

**Supplementary Fig. 1. Flow diagram of the methodology of this study.**

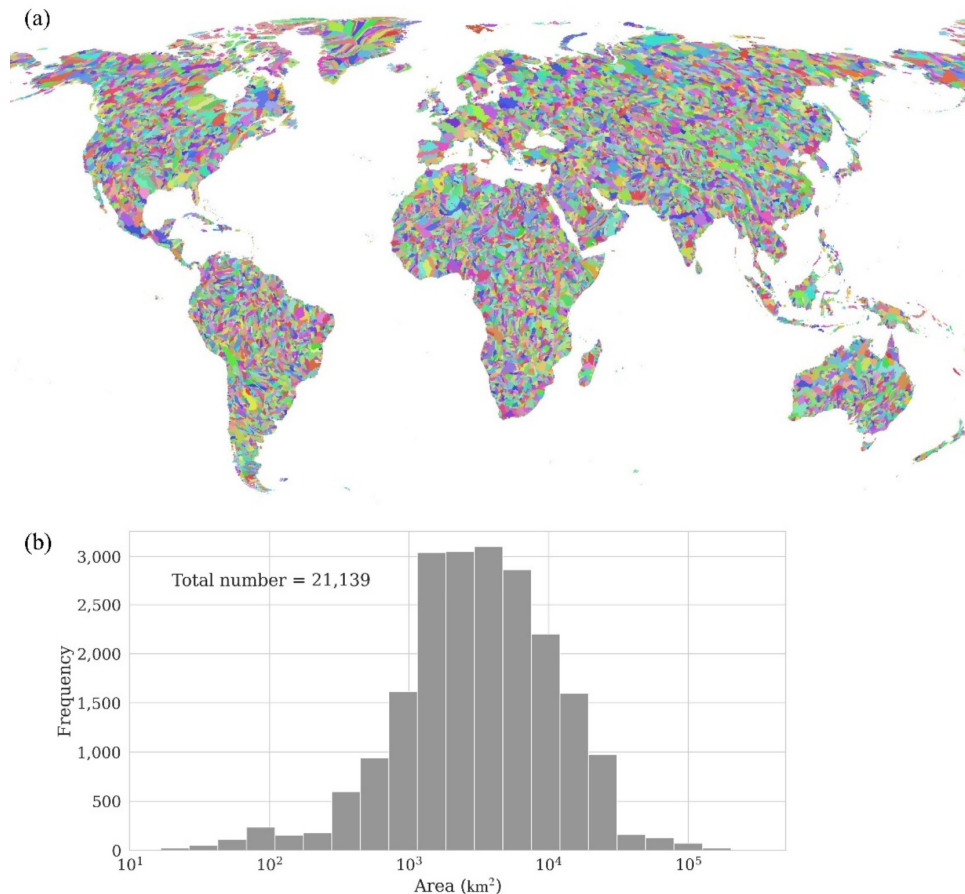

**Supplementary Fig. 2. Map and area distribution of the subbasins developed in this study. (a) Global distribution of subbasins, with adjacent basins shown in different colors. (b) Frequency distribution of subbasin areas on a logarithmic scale.**

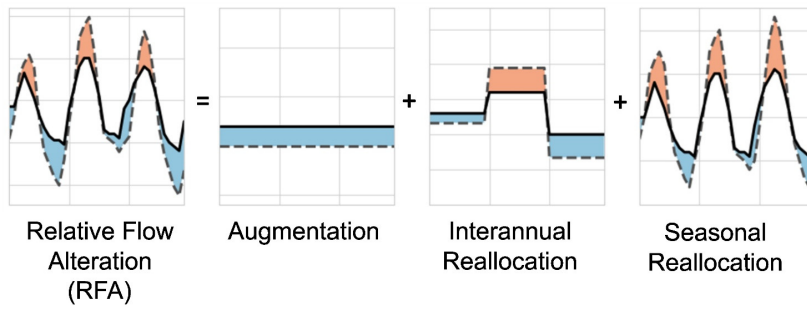

**Supplementary Fig. 3. Conceptual diagram of relative flow alteration and its decomposition into augmentation, interannual reallocation, and seasonal reallocation.** The black solid and dotted lines represent water availability with and without infrastructure, respectively. The shaded area shows the difference between the two conditions: periods when water availability with infrastructure exceeds that without infrastructure are shown in blue, while periods when the opposite occurs are shown in red.

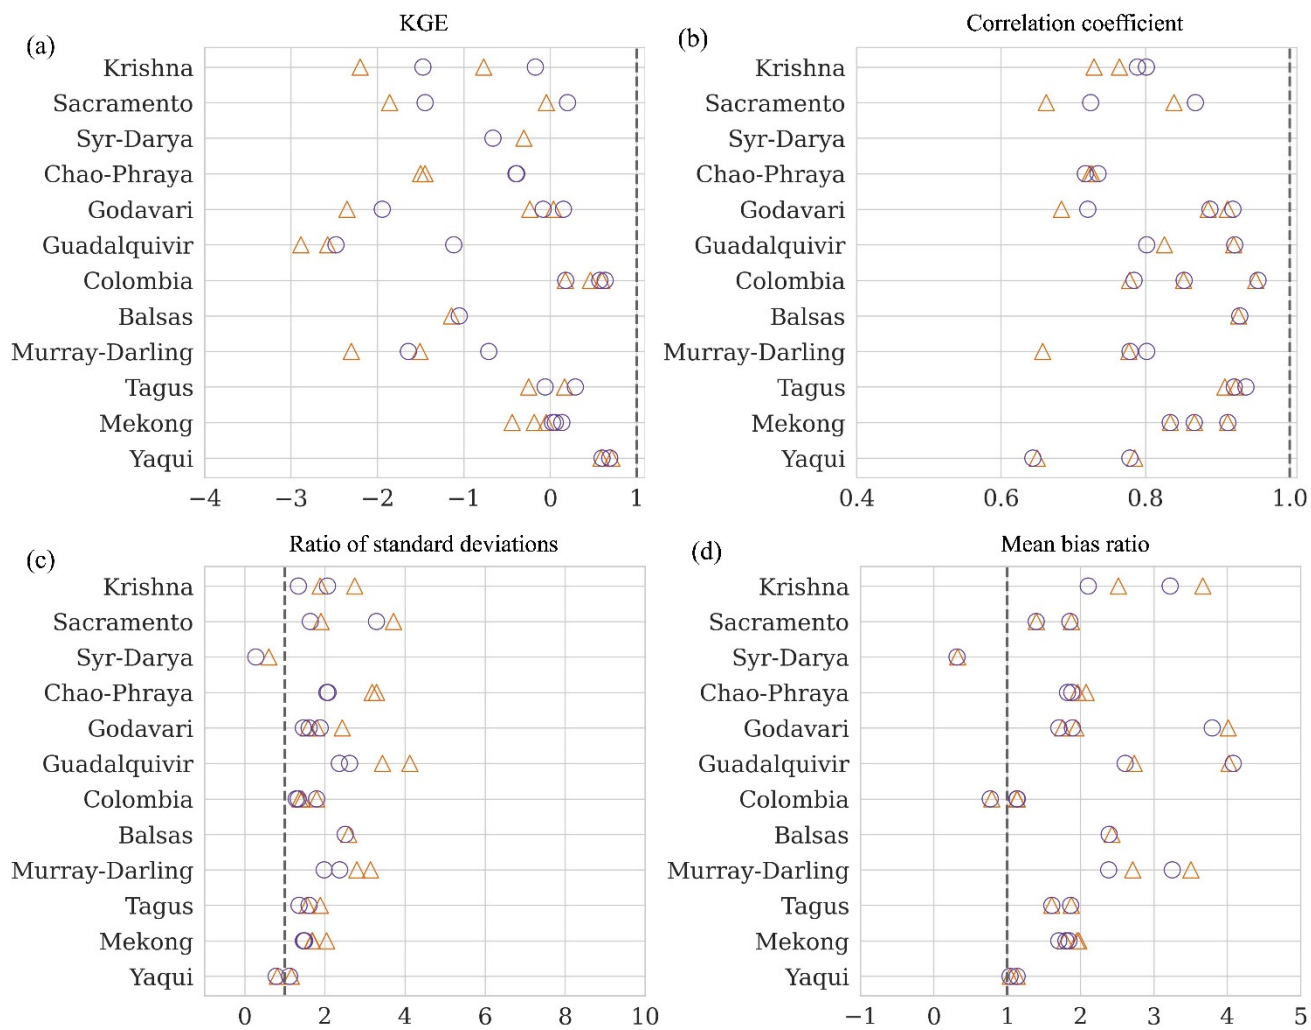

**Supplementary Fig. 4. Validation results for monthly discharge based on the Kling-Gupta Efficiency (KGE) and its three components (corresponding to Supplementary Table 3).** Scatter plots showing (a) the Kling-Gupta Efficiency (KGE), (b) the correlation coefficient, (c) the ratio of standard deviations, and (d) the bias ratio (comparing the mean values of the simulated and observed flows). The results are shown for 25 stations across 12 basins. The circles indicate simulations with reservoirs and desalinations (wRD), and the rectangles indicate simulations without reservoirs and desalinations (woRD). The dashed lines denote the most accurate reference values.



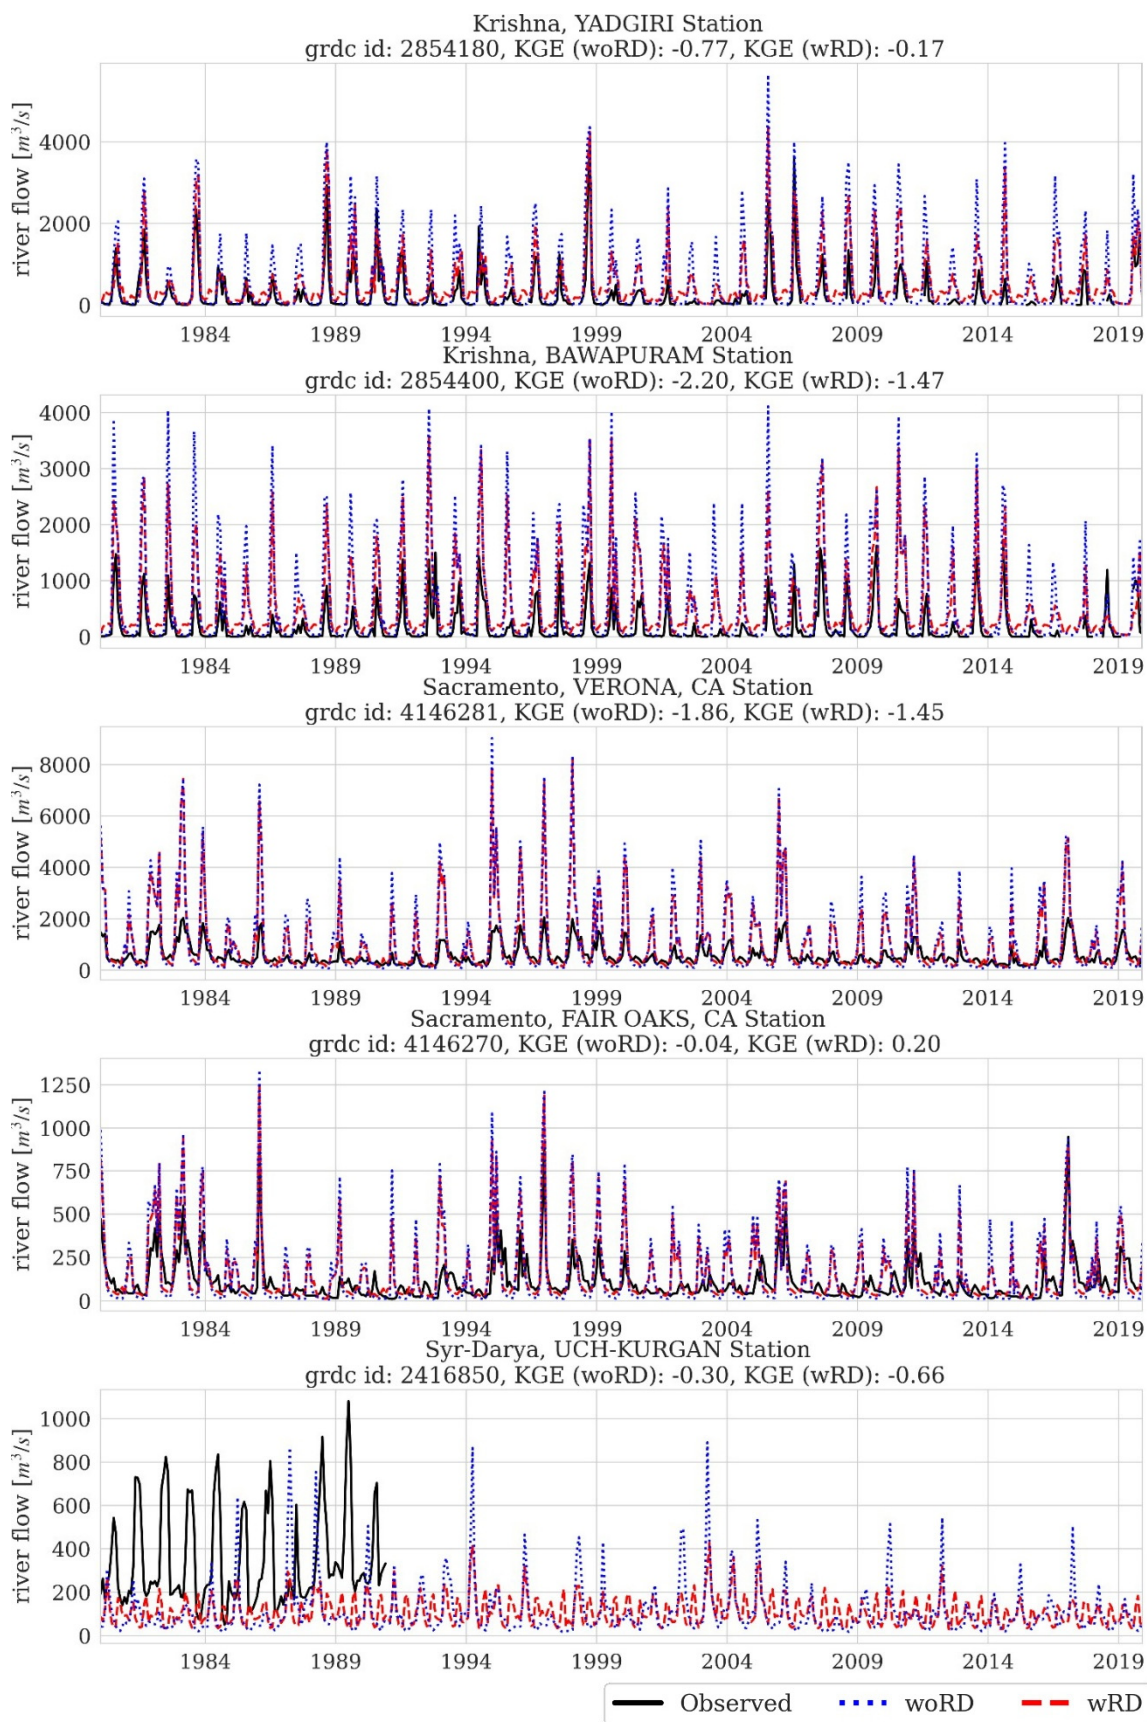

**Supplementary Fig. 5. Time series of monthly discharge at 25 selected observation stations (1--5)**

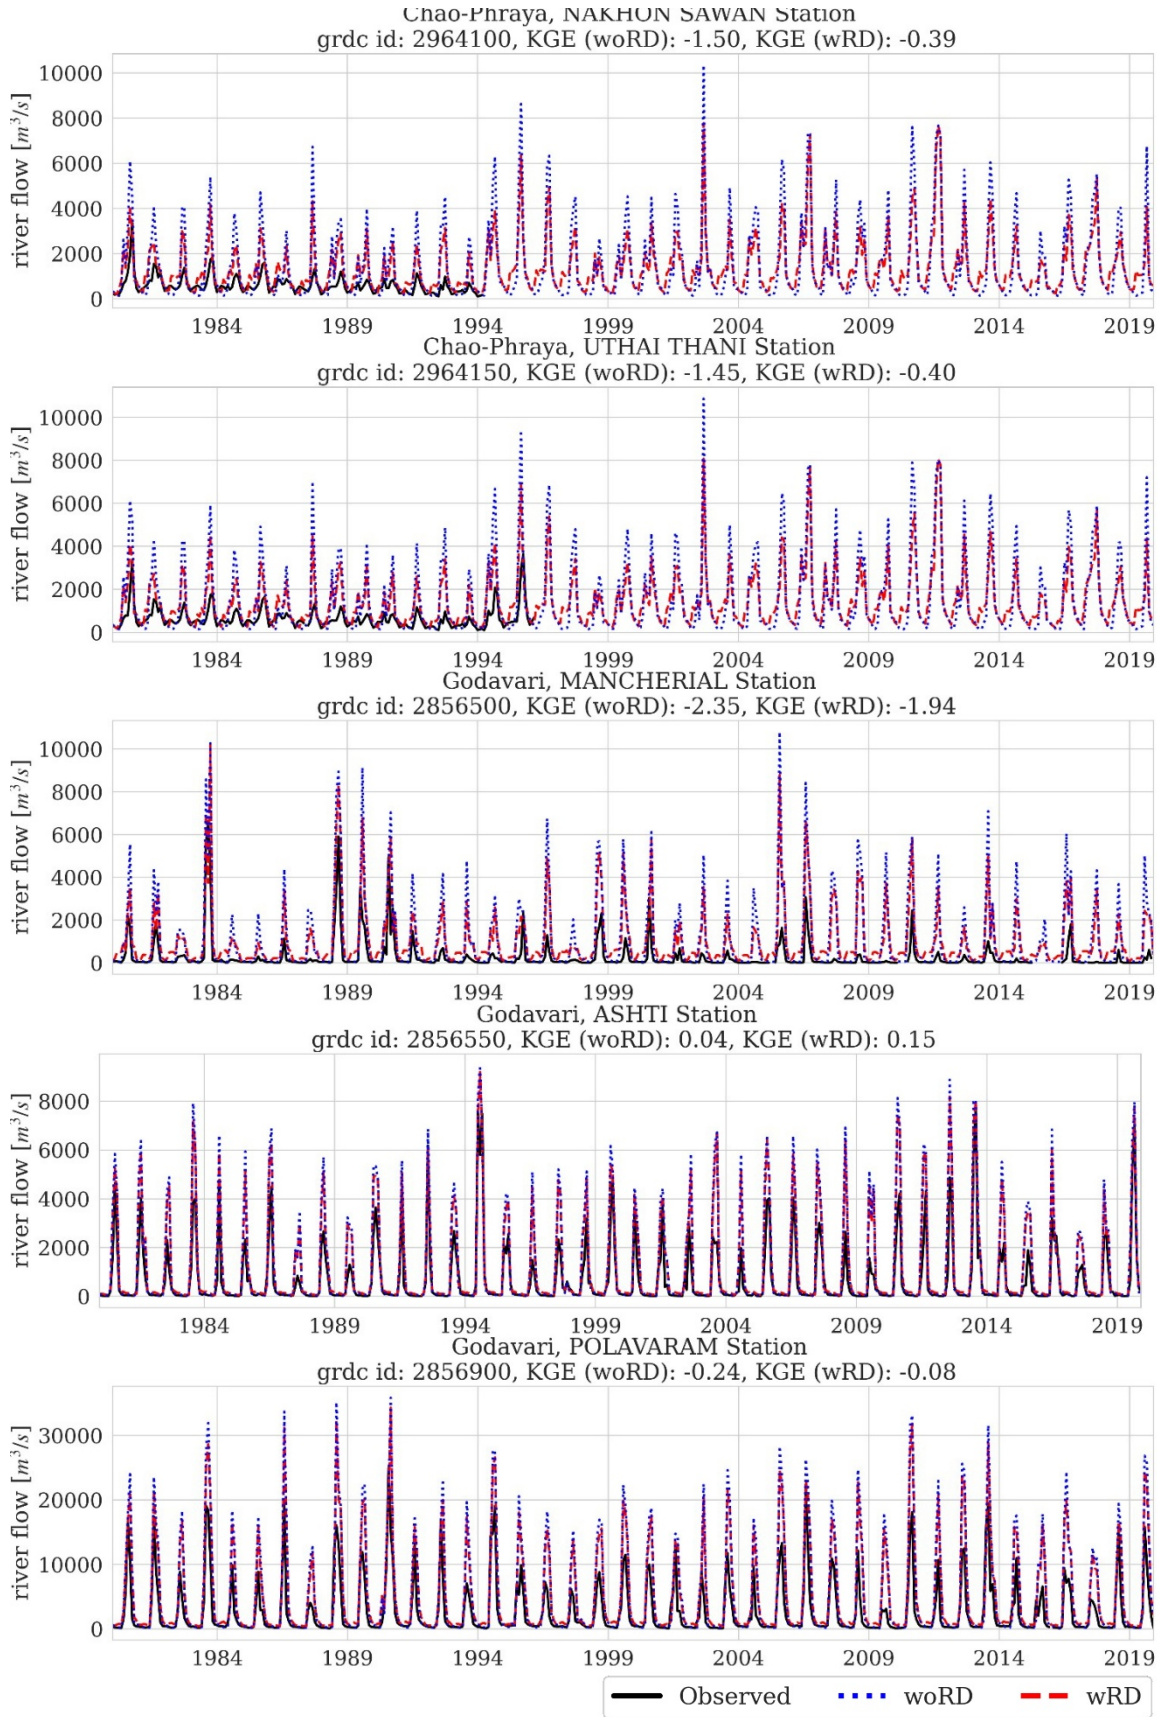

Supplementary Fig. 6. Time series of monthly discharge at 25 selected observation stations (6--10)



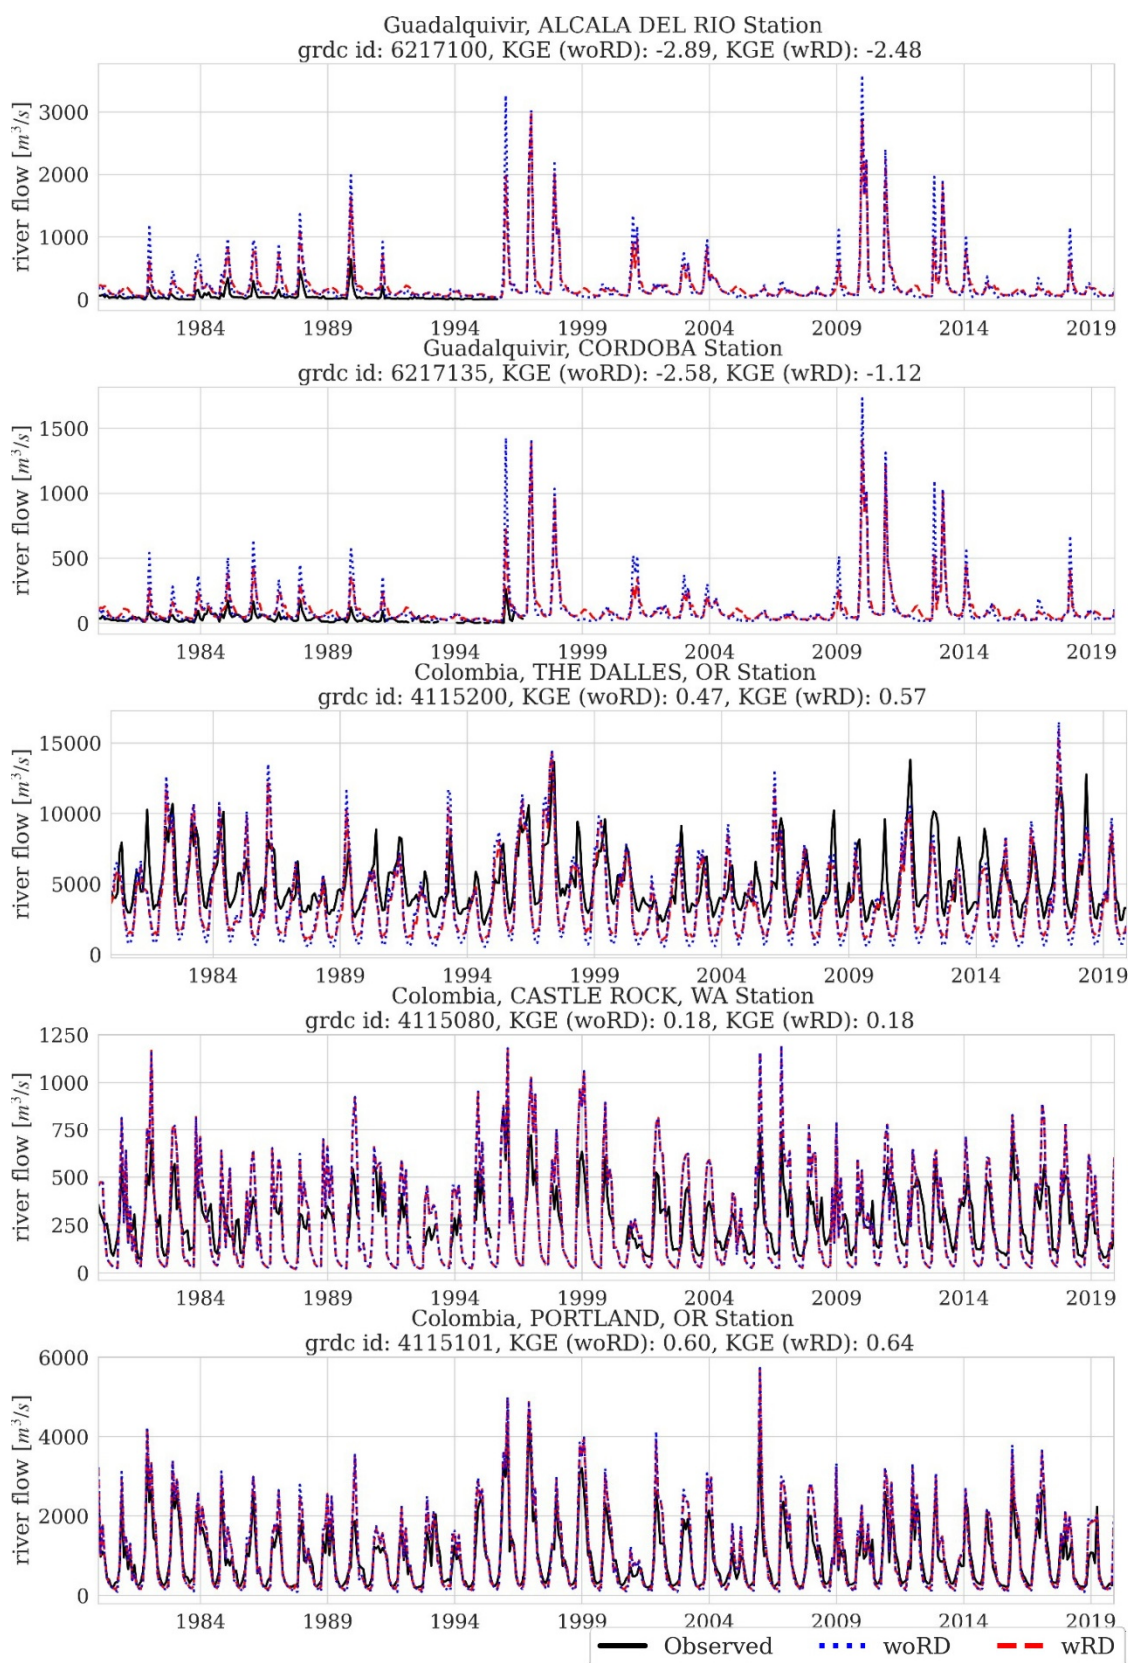

**Supplementary Fig. 7. Time series of monthly discharge at 25 selected observation stations (11--15)**

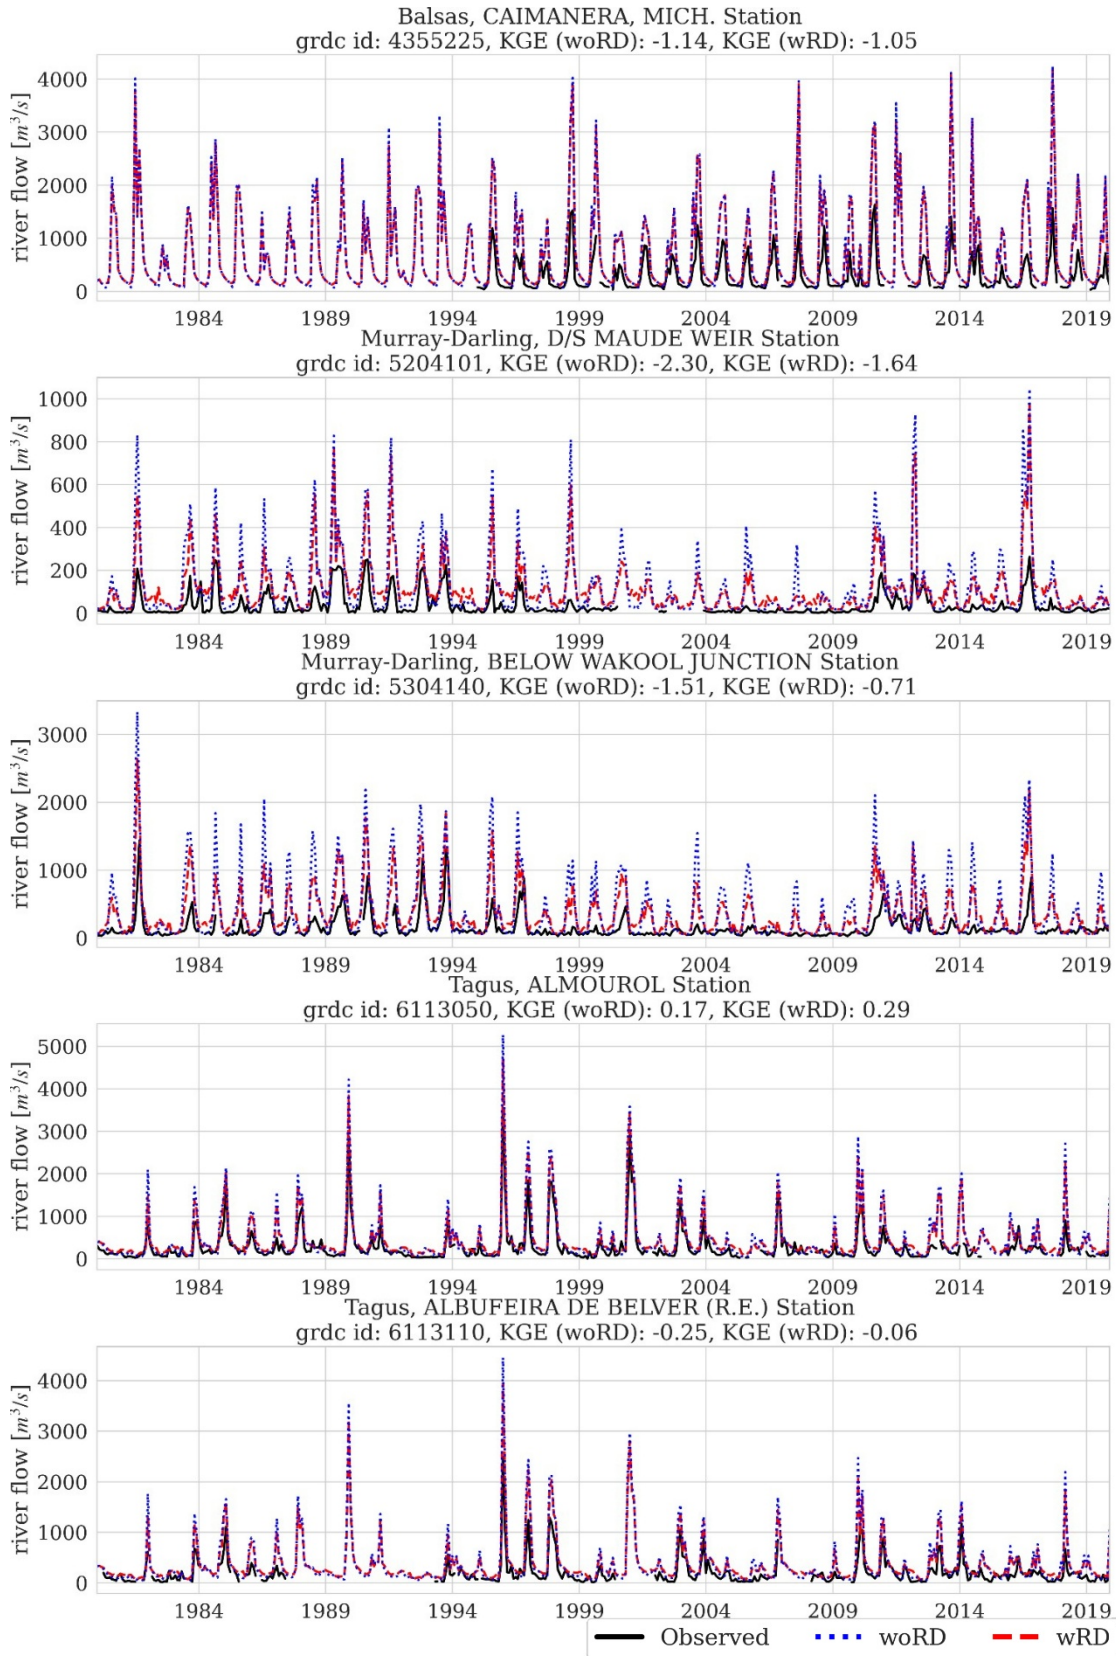

**Supplementary Fig. 8. Time series of monthly discharge at 25 selected observation stations (16--20)**

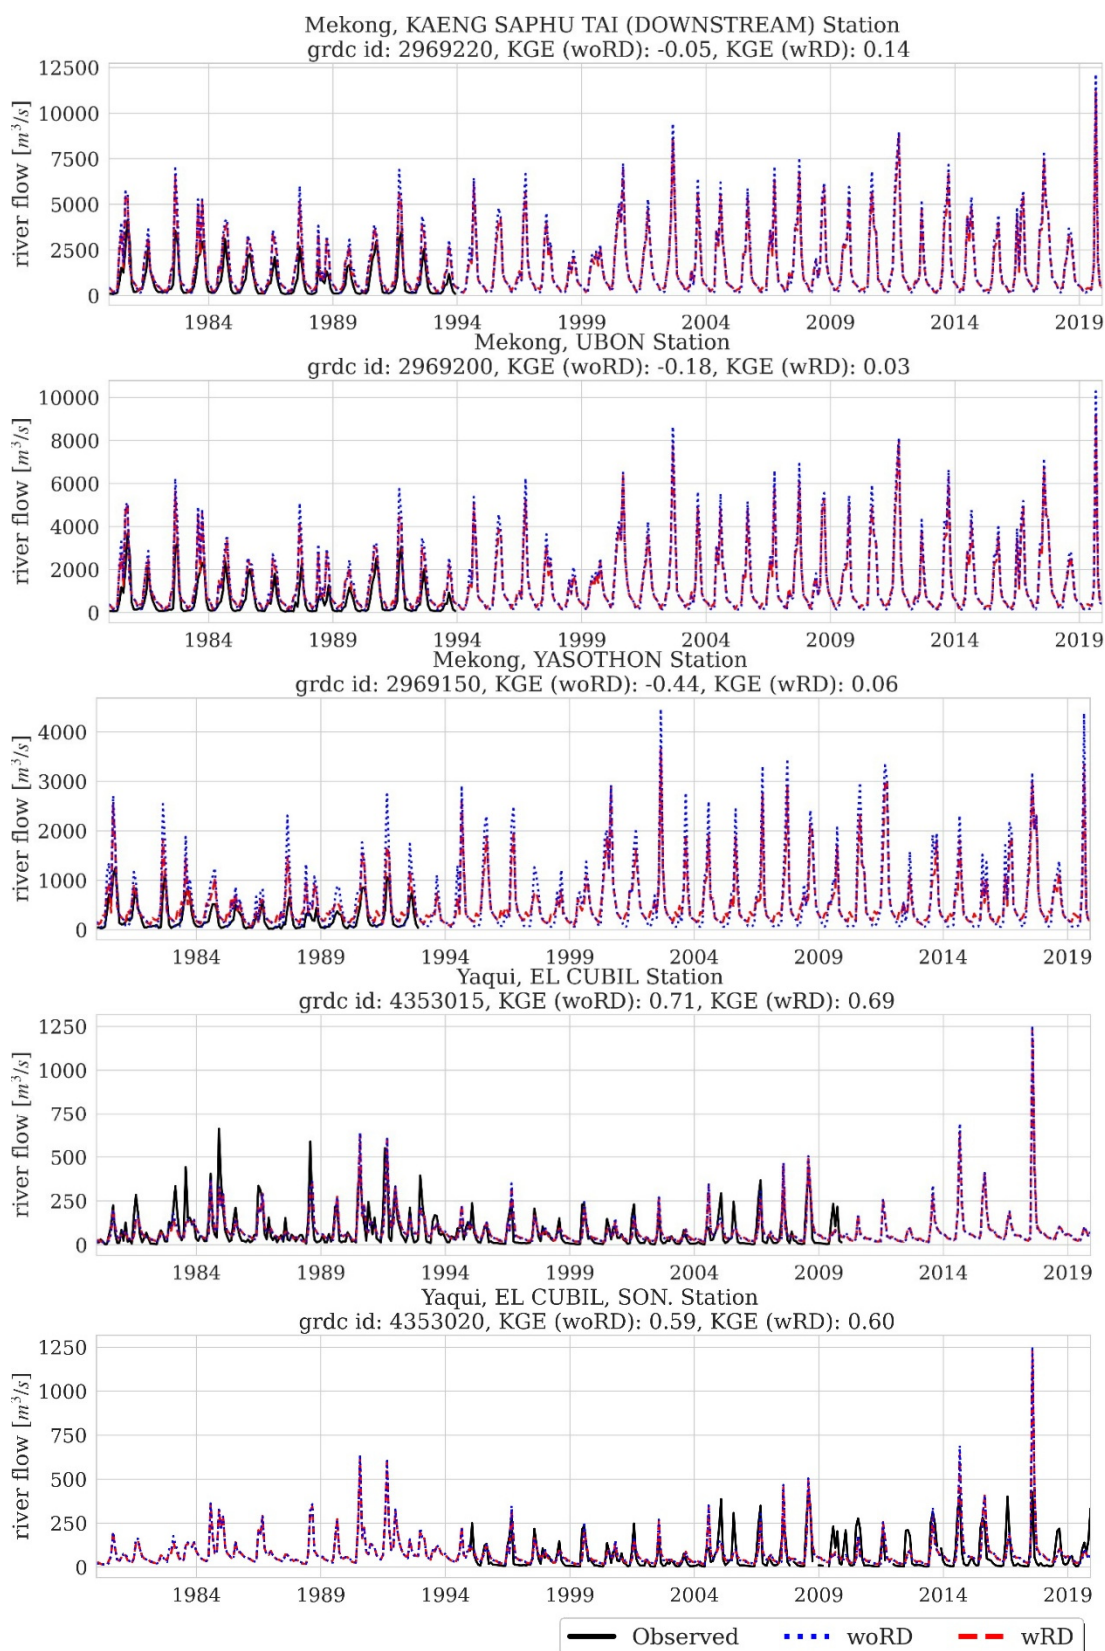

**Supplementary Fig. 9. Time series of monthly discharge at 25 selected observation stations (21--25)**



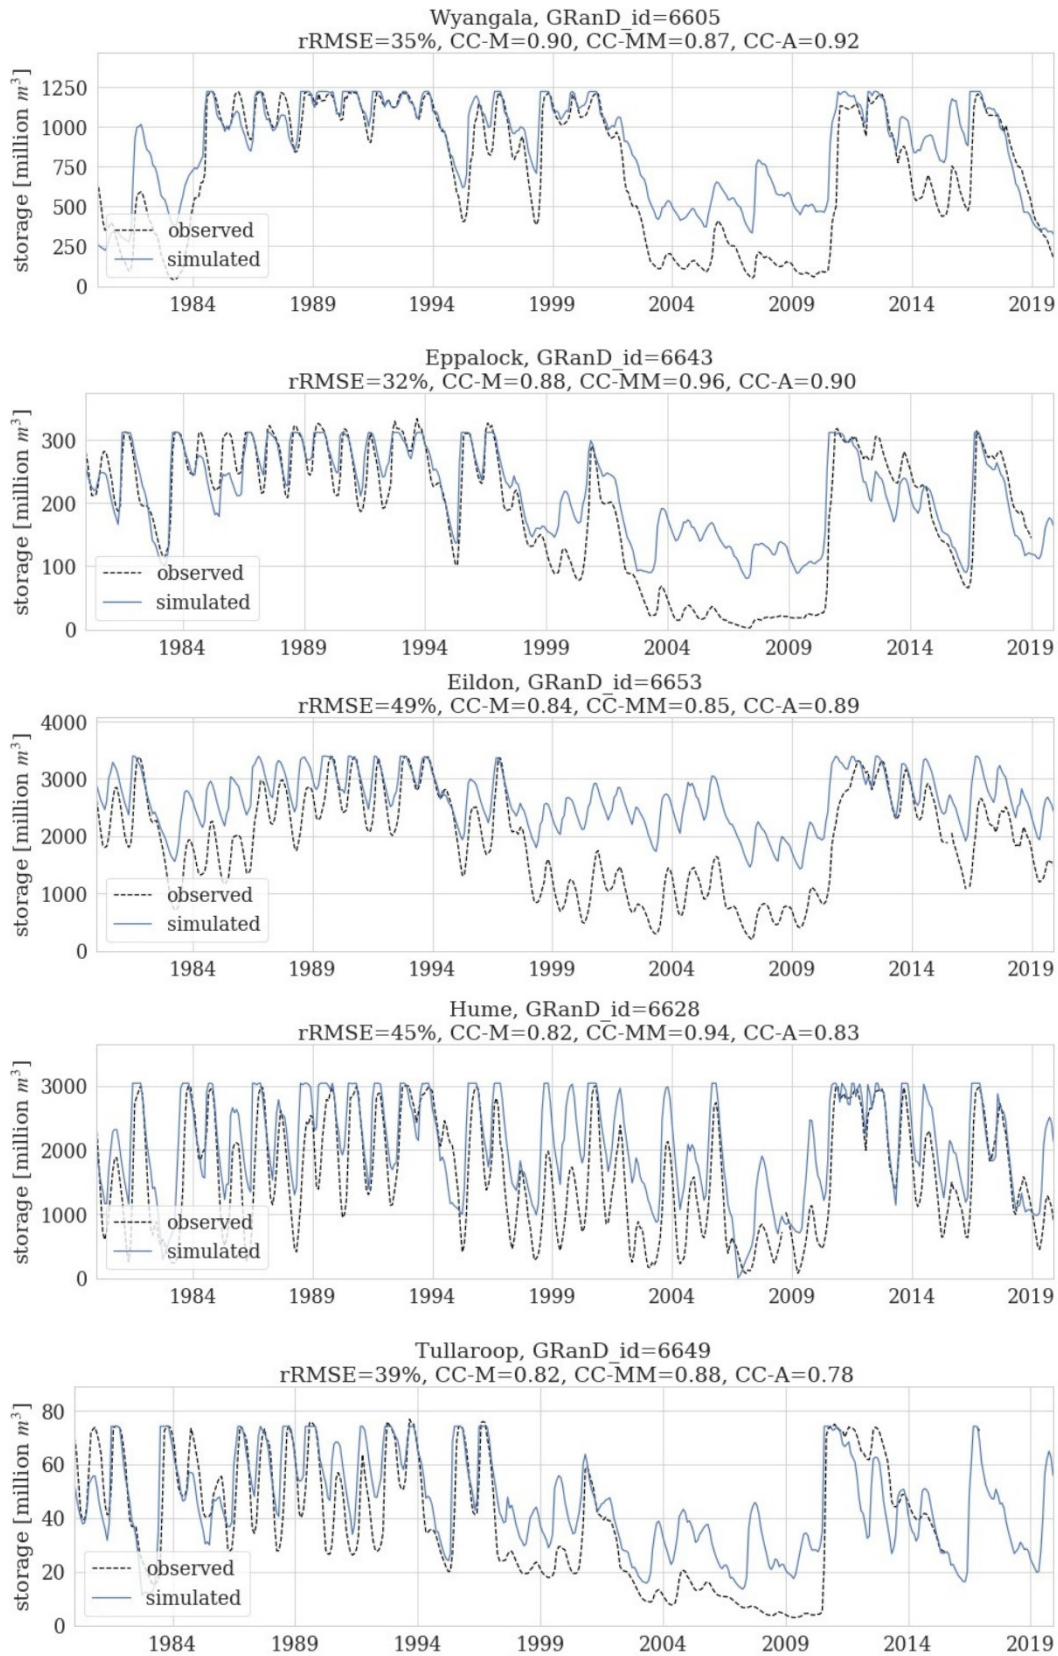

**Supplementary Fig. 10. Time series of monthly reservoir storage in the Murray River Basin, with good agreement between the observed and simulated values (top 1 to 5).**

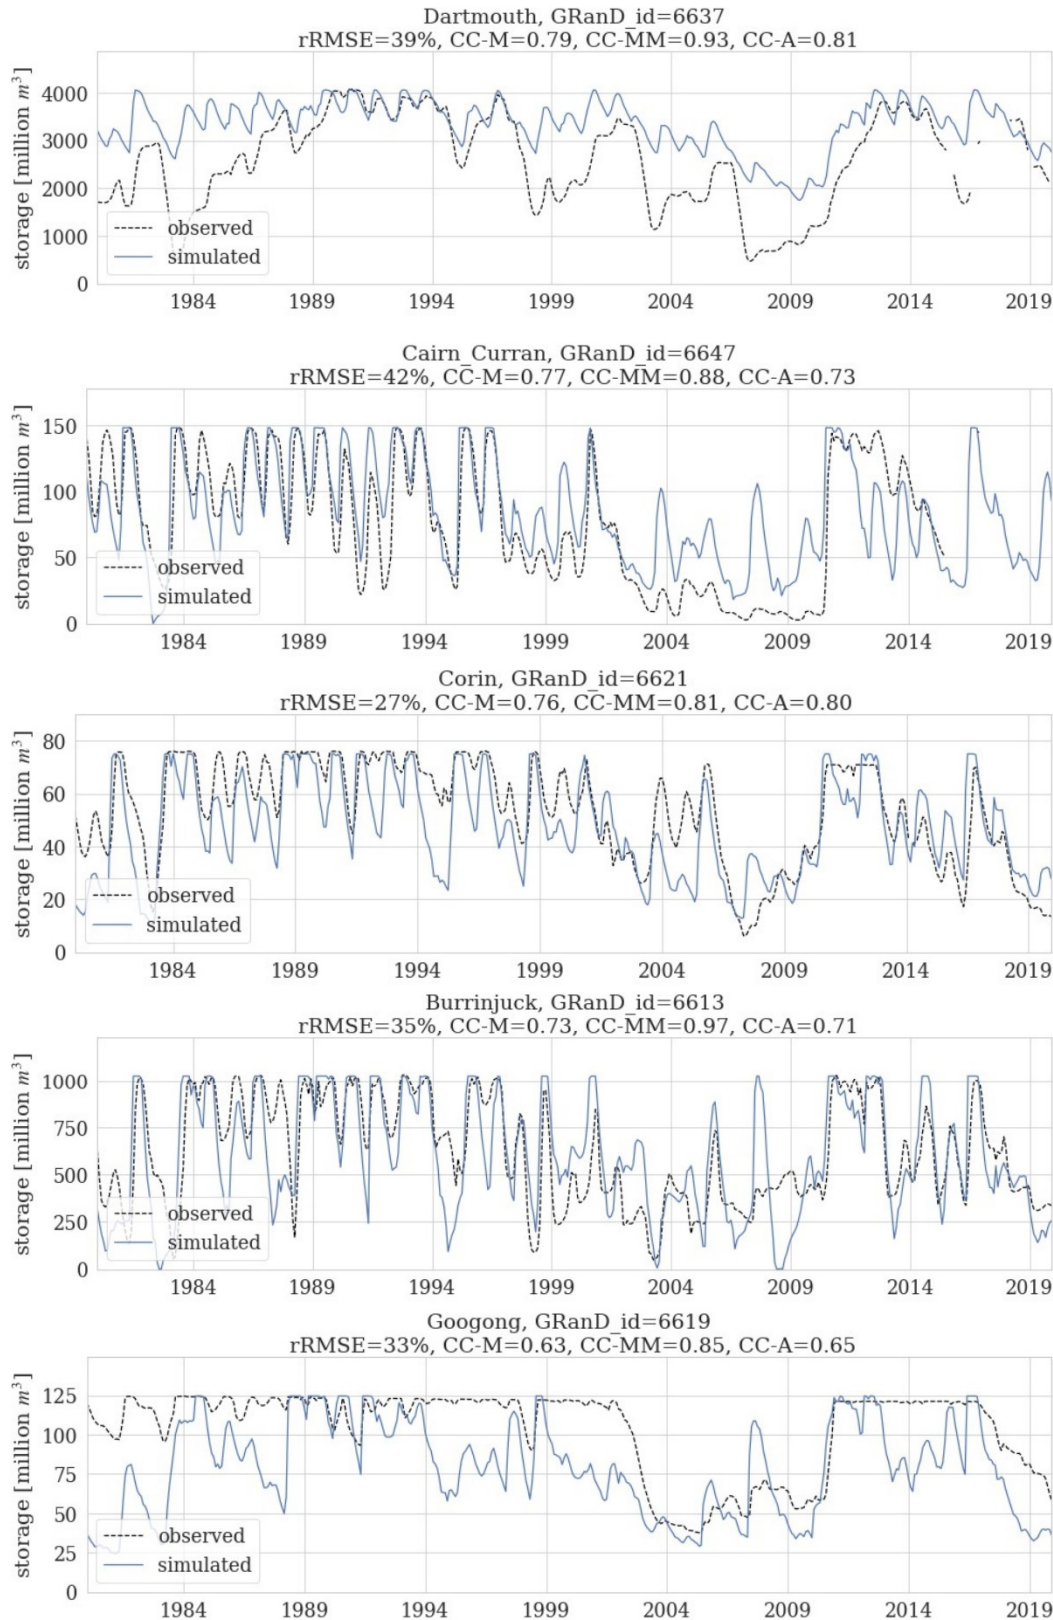

**Supplementary Fig. 11. Time series of monthly reservoir storage in the Murray River Basin, with good agreement between the observed and simulated values (top 6--10).**

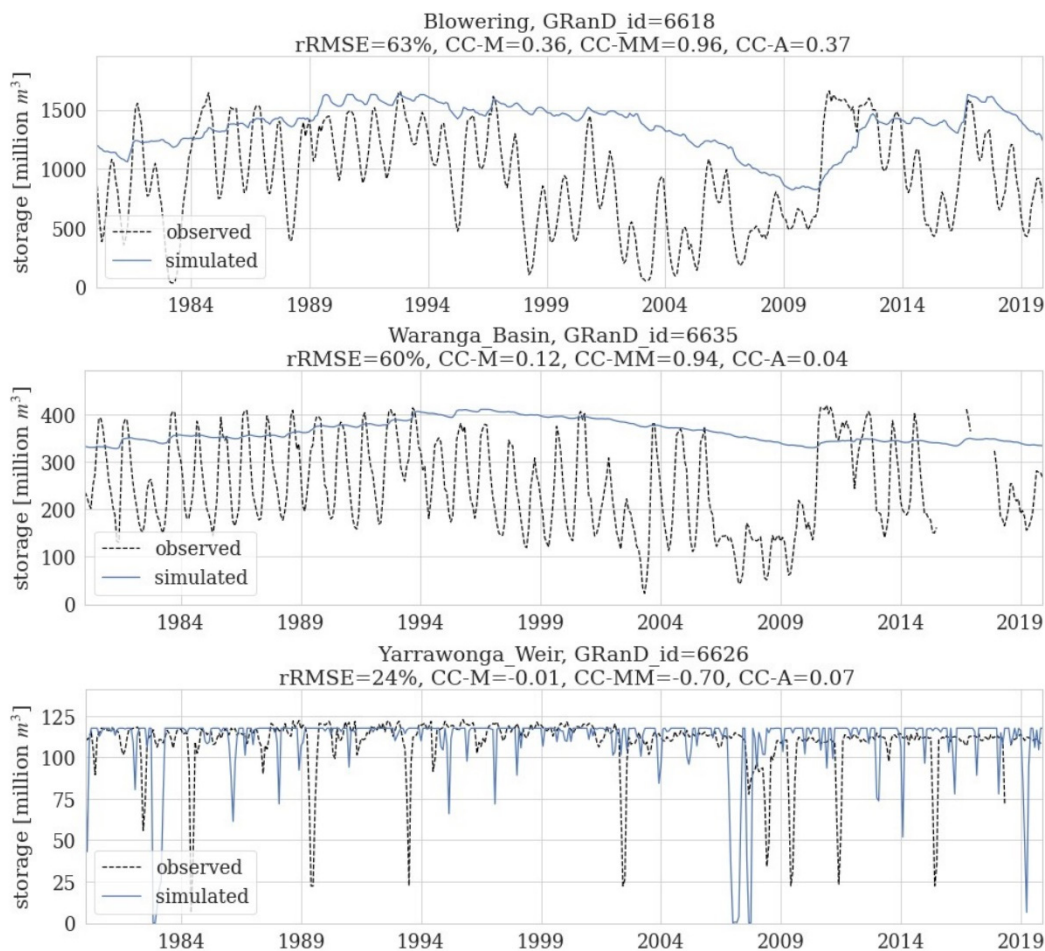

**Supplementary Fig. 12. Time series of monthly reservoir storage in the Murray River Basin, with poor agreement between the observed and simulated values.**

### Supplementary References

1. Gupta, H. V., Kling, H., Yilmaz, K. K. & Martinez, G. F. Decomposition of the mean squared error and NSE performance criteria: Implications for improving hydrological modelling. *J. Hydrol.* **377**, 80–91 (2009).
2. Marti, B. *et al.* CA-discharge: Geo-Located Discharge Time Series for Mountainous Rivers in Central Asia. *Sci. Data* **10**, 1–21 (2023).
3. Heinicke, S. *et al.* Global hydrological models continue to overestimate river discharge. *Environ. Res. Lett.* **19**, (2024).
4. Australian Bureau of Meteorology. Water Data Online. <http://www.bom.gov.au/waterdata/>.
5. Goulburn-Murray Water. About Warange Basin. <https://www.g-mwater.com.au/water-operations/storages/goulburn/warangabasin>.
6. Murray-Darling Basin Authority. Yarrawonga Weir. <https://www.mdba.gov.au/water-management/infrastructure/weirs-and-locks/yarrawonga-weir>.
